# Supplementary material for: Japanese quails (Coturnix Japonica) show keel bone damage during the laying period—a radiography study
Source: Front Physiol. 2024 Mar 6;15:1368382. doi: 10.3389/fphys.2024.1368382 (PMC10967949; doi:10.3389/fphys.2024.1368382)
Supplement: Supplementary file 1 [file Table2.XLSX]

## Sheet: Tabelle1
Age[Days]	Number of Eggs	Number of Animals
43.	0	108
44.	0	108
45.	0	108
46.	0	108
47.	13	51
48.	23	51
49.	23	51
50.	23	51
51.	24	51
52.	23	51
53.	26	51
54.	28	51
55.	29	51
56.	35	51
57.	30	51
58.	38	51
59.	37	51
60.	43	51
61.	41	51
62.	37	51
63.	42	51
64.	36	51
65.	39	50
66.	39	49
67.	41	49
68.	44	49
69.	40	48
70.	36	48
71.	45	47
72.	39	47
73.	40	47
74.	35	47
75.	38	47
76.	32	47
77.	39	46
78.	33	46
79.	38	46
80.	35	46
81.	38	46
82.	40	46
83.	40	46
84.	39	46
85.	36	46
86.	42	46
87.	37	46
88.	38	46
89.	40	46
90.	38	45
91.	38	45
92.	40	45
93.	40	45
94.	38	45
95.	37	45
96.	40	45
97.	34	44
98.	34	44
99.	35	44
100.	37	44
101.	36	44
102.	37	44
103.	40	44
104.	35.6667	44
105.	35.6667	44
106.	35.6667	44
107.	36	44
108.	41	44
109.	33	44
110.	37	44
111.	33.75	44
112.	33.75	44
113.	33.75	44
114.	33.75	44
115.	38	44
116.	37	44
117.	40	44
118.	37	44
119.	37	44
120.	37	44
121.	39	44
122.	36	44
123.	36	44
124.	35	44
125.	36.3333	44
126.	36.3333	44
127.	36.3333	43
128.	32	43
129.	33	43
130.	36	43
131.	27	43
132.	32	43
133.	32	43
134.	32	43
135.	34	43
136.	29	42
137.	28	42
138.	30	42
139.	29	42
140.	29	42
141.	29	42
142.	32	42
143.	31	42
144.	34	42
145.	37	42
146.	34	42
147.	34	42
148.	34	42
149.	34	41
150.	34	41
151.	34	41
152.	32	41
153.	32.6667	41
154.	32.6667	41
155.	32.6667	41
156.	31	41
157.	33	41
