# Supplementary material for: Japanese quails (Coturnix Japonica) show keel bone damage during the laying period—a radiography study
Source: Front Physiol. 2024 Mar 6;15:1368382. doi: 10.3389/fphys.2024.1368382 (PMC10967949; doi:10.3389/fphys.2024.1368382)
Supplement: Supplementary file 2 [file Table3.XLSX]

## Sheet: Tabelle1
Whole Egg Weight [g]	Weight of the Eggshell [g]	Age [weeks]
9.242	1.976	8
9.46	1.199	8
10.326	0.89	8
13.263	1.141	8
10.855	0.883	8
16.576	1.09	8
13.376	0.958	8
12.678	1.008	8
12.151	1.033	8
9.384	0.844	8
13.296	1.162	8
12.704	0.959	8
12.626	1.1	8
11.024	0.966	8
12.914	1.082	8
15.695	1.144	8
12.721	1.033	8
10.816	0.881	8
11.632	0.933	8
11.774	1.078	8
11.441	0.952	8
13.232	1.073	8
11.186	1.096	8
13.415	1.255	9
13.336	1.259	9
10.526	0.898	9
11.627	1.034	9
13.657	1.079	9
11.579	0.901	9
13.657	1.151	9
11.921	1.005	9
13.355	1.175	9
13.712	1.188	9
11.716	0.996	9
13.185	1.099	9
11.876	1.006	9
15.272	1.139	9
12.192	0.99	9
13.775	1.119	9
11.619	1.021	9
12.457	1.021	9
12.848	1.03	9
10.889	0.918	9
10.739	0.95	9
12.002	0.991	9
12.043	1.106	9
13.455	1.093	9
14.625	1.255	9
13.625	1.272	9
12.191	1.048	9
11.034	0.968	9
13.515	1.123	9
11.361	0.894	9
9.753	0.926	9
12.977	1.19	9
11.74	0.993	9
11.436	1.022	9
13.474	1.115	9
12.752	1.035	9
13.239	1.073	9
12.606	0.983	10
12.265	1.065	10
12.409	1.044	10
13.249	1.155	10
13.55	1.092	10
11.666	0.983	10
12.545	1.031	10
11.421	0.846	10
13.3	0.938	10
13.195	0.968	10
14.068	1.145	10
13.652	1.175	10
11.593	1.051	10
14.63	1.252	10
14.447	1.259	10
11.348	1.067	10
12.229	0.97	10
11.099	0.896	10
11.995	0.97	10
15.04	1.167	10
14.19	1.161	10
11.895	1.04	10
10.814	0.967	10
13.263	1.009	10
11.686	1.04	10
11.484	1.007	10
12.892	1.072	10
14.078	1.286	10
12.175	1.018	10
9.263	0.727	10
13.686	1.237	10
12.04	0.903	10
12.388	1.135	10
14.265	1.182	10
11.765	0.956	10
13.541	1.292	10
13.649	1.177	10
13.659	1.263	10
11.287	1.023	10
12.467	1.088	11
11.296	1.027	11
13.019	1.038	11
12.496	1.063	11
13.912	1.227	11
11.37	0.962	11
10.847	0.966	11
10.795	0.918	11
12.624	1.185	11
14.267	1.116	11
13.313	1.196	11
14.756	1.151	11
13.582	1.183	11
13.128	1.076	11
12.43	1.009	11
12.836	1.186	11
12.368	1.093	11
14.88	1.198	11
12.715	1.035	11
13.806	1.243	11
14.235	1.239	11
14.316	1.181	11
12.649	0.981	11
12.554	1.088	11
11.426	1.077	11
12.578	0.987	11
14.155	1.216	11
13.626	1.178	11
11.55	1.066	11
10.205	0.85	11
11.569	0.949	11
13.836	1.007	11
11.895	1.069	11
12.105	0.989	11
10.99	0.995	11
13.359	1.167	12
10.903	1.008	12
14.446	1.212	12
12.276	1.113	12
11.109	0.895	12
13.152	1.213	12
11.886	0.984	12
14.326	1.213	12
13.942	1.231	12
11.237	0.953	12
10.399	0.796	12
12.379	1.094	12
14.615	1.216	12
13.251	1.031	12
14.315	1.309	12
10.823	0.989	12
11.448	1.048	12
12.202	1.115	12
12.11	0.899	12
13.298	1.01	12
11.396	1.08	12
13.49	1.128	12
9.804	0.887	12
12.495	1.153	12
13.53	1.1	12
13.262	1.062	12
12.424	0.989	12
13.376	1.044	12
13.196	1.067	12
12.398	1.137	12
12.883	1.087	12
13.87	1.19	12
11.262	0.855	12
11.754	1.083	12
12.398	1.074	12
11.6	1.056	13
14.135	1.29	13
14.702	1.282	13
14.127	1.053	13
14.762	1.245	13
13.269	1.059	13
12.629	1.081	13
14.178	1.126	13
12.137	1.029	13
13.833	1.015	13
13.301	1.018	13
13.522	1.22	13
14.545	1.346	13
15.188	1.18	13
12.567	1.09	13
14.105	1.329	13
14.729	1.263	13
14.14	1.217	13
12.807	0.977	13
11.666	0.973	13
11.734	0.953	13
14.7	1.256	13
12.632	1.028	13
14.042	1.195	13
12.597	0.977	13
11.5	0.942	13
13.135	1.097	13
13.123	1.156	13
13.048	1.029	13
12.855	0.967	13
10.994	0.955	13
13.28	1.106	13
12.378	1.094	13
11.041	0.836	13
12.022	1.091	13
12.191	1.085	13
12.979	1.08	13
14.31	1.175	14
11.016	0.92	14
15.092	1.268	14
13.824	1.155	14
14.318	1.168	14
13.198	1.015	14
12.098	1.091	14
12.786	1.064	14
12.826	1.056	14
12.077	1.134	14
11.441	1.046	14
10.787	0.846	14
12.937	1.096	14
12.333	1.027	14
13.647	1.125	14
12.757	1.043	14
13.089	1.116	14
13.144	1.185	14
13.362	1.163	14
13.149	1.067	14
11.787	1.045	14
13.59	1.183	14
13.549	1.112	14
13.942	1.32	14
12.057	1.043	14
12.153	1.035	14
14.568	1.357	14
10.973	1.248	14
13.186	1.206	14
13.059	1.096	14
11.419	1.056	14
13.403	1.049	14
12.965	1.049	14
12.278	1.055	14
10.242	0.966	14
14.494	1.173	14
12.208	1.003	14
14.228	1.2	14
12.063	0.977	15
13.265	1.039	15
12.363	1.033	15
11.672	1.065	15
12.405	0.977	15
11.994	1.08	15
13.641	1.183	15
14.633	1.208	15
14.134	1.341	15
12.957	0.962	15
13.963	1.202	15
11.876	0.933	15
13.487	1.179	15
10.248	0.855	15
11.338	1.048	15
12.943	1.135	15
10.86	0.917	15
12.485	1.02	15
11.447	0.971	15
12.243	1.059	15
10.836	0.932	15
12.884	1.275	15
10.73	0.837	15
12.86	1.085	15
12.861	1.017	15
12.88	1.141	15
13.893	1.016	15
13.17	1.054	15
13.117	1.034	15
11.352	1.072	15
8.633	0.826	15
12.949	1.128	15
13.45	0.915	15
13.402	1.166	15
13.568	1.035	15
11.059	0.944	16
12.004	1.058	16
12.03	1.046	16
12.993	1.127	16
12.52	0.868	16
11.095	0.981	16
13.514	1.158	16
11.726	1.091	16
12.349	1.139	16
12.73	1.056	16
3.262	0.401	16
10.773	0.91	16
12.236	1.131	16
12.928	1.096	16
12.855	1.155	16
13.512	1.138	16
13.115	0.842	16
13.802	1.104	16
12.021	0.998	16
10.455	0.899	16
10.957	0.982	16
14.451	1.365	16
10.157	0.082	16
12.491	1.031	16
14.106	1.146	16
11.905	0.904	16
11.351	1.128	16
10.336	1.016	16
10.936	1.077	16
0.01187	0.972	16
12.136	0.92	16
12.957	1.135	16
12.607	1.094	16
12.127	1.084	16
13.242	1.151	16
12.343	1.033	16
13.115	1.107	16
13.313	1.106	16
11.322	0.973	16
11.024	0.992	16
11.775	0.999	16
11.658	1.033	17
11.192	0.856	17
12.468	1.107	17
12.503	1.049	17
10.697	0.893	17
12.896	1.055	17
11.658	0.918	17
12.15	0.966	17
12.729	1.102	17
11.416	0.982	17
11.628	0.919	17
12.247	1.05	17
13.291	0.969	17
10.584	1.062	17
13.171	1.111	17
12.078	0.97	17
12.163	0.997	17
12.469	1.107	17
13.111	1.036	17
11.639	0.988	17
12.206	1.066	17
11.449	1.051	17
10.281	0.821	17
13.058	1.294	17
13.844	1.294	17
12.661	1.163	17
11.521	0.997	17
12.789	1.059	17
12.216	1.118	17
12.906	1.055	17
12.291	0.999	17
11.595	1.062	17
11.34	1.055	17
11.09	0.996	17
13.021	1.124	17
12.612	1.081	17
13.286	1.081	17
13.363	1.049	17
12.925	1.205	18
12.983	1.067	18
12.972	1.164	18
12.199	1.035	18
11.604	0.898	18
12.28	1.072	18
13.558	1.153	18
13.448	1.037	18
11.156	1.086	18
11.996	1.104	18
12.002	1.083	18
11.415	1.044	18
12.412	1.008	18
10.91	0.954	18
13.8	1.226	18
11.417	1.053	18
12.075	1.048	18
14.02	1.162	18
11.534	0.976	18
11.39	1.044	18
10.318	0.975	18
12.481	1.006	18
11.869	0.944	18
12.283	0.992	18
9.531	0.838	18
11.149	1.004	18
13.138	1.017	18
11.706	0.939	18
10.866	0.846	18
11.672	1.034	18
13.3	1.147	18
12.853	1.163	18
13.389	1.167	18
10.512	0.919	18
11.761	1.118	18
12.714	1.147	18
12.116	0.999	19
11.921	1.015	19
11.51	1.088	19
10.492	1.005	19
9.67	0.95	19
12.983	1.161	19
10.964	0.859	19
13.639	1.081	19
9.986	0.954	19
13.223	1.211	19
12.13	0.955	19
12.859	1.104	19
10.848	0.976	19
12.084	1.099	19
12.695	1.061	19
10.416	0.879	19
11.866	1.083	19
11.435	0.989	19
12.619	1.132	19
11.804	1.036	19
11.913	1.016	19
10.515	0.937	19
11.972	1.005	19
11.638	0.94	19
10.964	0.918	19
9.833	0.855	19
13.029	1.029	19
10.873	0.975	19
14.636	1.05	19
13.611	1.151	19
13.91	1.092	19
8.947	0.741	20
10.016	0.946	20
11.88	0.966	20
11.499	0.988	20
13.873	1.142	20
13.774	1.064	20
11.483	1.016	20
11.075	0.976	20
11.596	1.069	20
12.75	1.113	20
11.699	1.081	20
11.494	0.92	20
11.888	1.001	20
11.095	0.92	20
10.729	0.928	20
11.103	0.981	20
11.109	0.874	20
12.785	1.055	20
11.926	0.997	20
12.746	1.065	20
11.33	0.929	20
12.818	1.169	20
11.891	1.051	20
13.126	1.159	20
10.786	0.974	20
12.694	1.116	20
12.169	1.001	20
12.395	0.998	20
9.719	0.83	20
9.054	0.82	21
13.788	1.058	21
13.728	1.225	21
10.47	1.062	21
13.037	1.144	21
15.176	1.231	21
10.346	0.927	21
10.462	1.009	21
13.089	1.131	21
12.433	1.022	21
12.444	1.004	21
11.892	0.957	21
11.265	0.864	21
12.565	1.04	21
12.111	1.145	21
15.248	1.268	21
11.893	1.119	21
11.024	0.992	21
12.696	1.006	21
10.81	0.983	21
13.279	1.081	21
12.622	1.104	21
10.466	0.99	21
13.395	1.231	21
12.413	1.119	21
10.451	0.988	21
13.944	1.186	21
12.521	1.124	21
10.761	1.057	21
12.591	1.161	21
11.653	0.912	21
12.508	1.012	22
13.664	1.106	22
13.438	1.142	22
14.242	1.201	22
12.787	1.042	22
12.409	1.128	22
11.339	0.999	22
11.346	0.953	22
12.864	1.149	22
11.531	0.985	22
11.495	0.986	22
12.676	1.096	22
12.741	1.076	22
12.642	0.942	22
11.011	0.956	22
12.762	1.006	22
13.65	1.162	22
13.207	1.105	22
12.54	1.076	22
15.551	1.257	22
9.947	0.987	22
13.247	1.176	22
14.391	1.215	22
11.773	0.929	22
12.904	0.967	22
13.261	1.07	22
13.152	0.985	22
13.562	1.225	22
13.653	1.198	22
12.412	0.951	22
13.47	1.14	22
15.296	1.005	22
13.977	1.267	22
10.877	0.9	22
15.343	1.252	23
13.532	1.16	23
15.336	1.199	23
13.973	1.16	23
11.926	1.018	23
13.664	1.241	23
13.445	1.116	23
13.556	1.194	23
11.606	0.91	23
11.275	1.02	23
12.055	1.066	23
13.866	1.042	23
14.429	1.314	23
14.989	1.335	23
12.743	1.048	23
13.76	1.184	23
13.376	1.163	23
13.298	1.139	23
12.43	0.996	23
11.282	0.974	23
11.905	1.1	23
11.767	1.033	23
13.103	1.199	23
14.788	1.279	23
11.799	1.12	23
11.834	0.99	23
14.043	1.135	23
12.262	0.907	23
13.391	1.105	23
11.337	1.081	23
14.02	1.316	23
13.122	1.059	23
14.162	1.063	23
