# Supplementary material for: Japanese quails (Coturnix Japonica) show keel bone damage during the laying period—a radiography study
Source: Front Physiol. 2024 Mar 6;15:1368382. doi: 10.3389/fphys.2024.1368382 (PMC10967949; doi:10.3389/fphys.2024.1368382)
Supplement: Supplementary file 3 [file Table1.XLSX]

## Sheet: Tabelle1
Animal Number	Age [Weeks)	Deviation Score	Radiographic Density [mm Al eq]	Lateral Surface Area [cm2]	Total Keel Bone Length [cm]	Length of the Cartilage Portion [cm]	Body Weight [g]	Deviation at Maceration
7649.	8	0	2.332	6.42179	5.38272	0.36214	265
7650.	8	0	2.268	6.94339	5.33333	0.518519	286
7651.	8	0	2.196	7.15338	5.66255	0.534979	288
7652.	8	0	2.566	7.59369	5.56379	0.518519	302
7653.	8	0	2.065	7.81724	5.6214	0.650206	286
7654.	8	0	2.723	8.00691	5.88477	0.73251	339
7655.	8	0	3.177	7.74272	5.8107	0.567901	316
7656.	8	0.4	2.387	7.51918	5.893	0.436214	307
7657.	8	0	2.435	7.40402	5.62963	0.411523	291
7658.	8	0	1.995	7.6953	5.93416	0.55144	335
7659.	8	0	2.026	7.70885	5.7037	0.600823	300
7660.	8	0	2.194	7.66143	5.8107	0.452675	320
7661.	8	0	2.313	7.48531	5.48971	0.436214	296
7662.	8	0	2.314	7.11274	5.61317	0.452675	271
7663.	8	0	2.349	7.75627	5.78601	0.444444	302
7664.	8	0	2.939	8.64367	5.99177	0.658436	346
7665.	8	0	2.278	7.64789	5.78601	0.683128	299
7666.	8	0	2.421	7.22112	5.80247	0.460905	348
7667.	8	0	2.169	7.18048	5.79424	0.477366	298
7668.	8	0	2.252	7.14661	5.75309	0.757202	346
7669.	8	0.2	2.711	7.74272	5.67078	0.740741	346
7670.	8	0	2.796	7.24822	5.78601	0.72428	333
7671.	8	0	2.487	6.835	5.8107	0.493827	302
7672.	8	0	2.455	7.30241	5.76132	0.436214	320
7673.	8	0.8	2.21	6.91629	5.78601	0.526749	298
7674.	8	0	2.396	6.87565	5.45679	0.699588	319
7675.	8	0	2.492	7.47176	5.58025	0.617284	299
7676.	8	0	2.193	7.97981	5.90123	0.773663	322
7677.	8	0	2.609	6.61146	5.46502	0	288
7678.	8	0	2.419	7.43789	5.7037	0.567901	328
7679.	8	0	2.546	8.2711	6.05761	0.888889	326
7680.	8	0	2.519	6.69952	5.40741	0.559671	310
7681.	8	0	2.489	6.95016	5.39095	0.847737	304
7682.	8	0	2.714	6.68597	5.76955	0	304
7683.	8	2	2.211	7.79014	6.16461	0.650206	330
7684.	8	0	2.406	7.68853	6.04938	0.493827	307
7685.	8	0.4	2.501	6.68597	5.47325	0.600823	311
7686.	8	0.2	2.008	7.13306	5.77778	0.37037	274
7687.	8	0	2.317	7.61402	6.05761	0.427984	310
7688.	8	0	2.318	7.1737	5.59671	0.592593	325
7689.	8	0	2.28	7.51918	5.60494	0.485597	314
7690.	8	0.2	2.633	6.56404	5.39095	0	274
7691.	8	0.6	2.397	7.41757	5.73663	0.592593	290
7692.	8	0	2.468	7.62079	6.13169	0.485597	322
7693.	8	0	2.451	7.50563	5.53909	0.609053	309
7694.	8	0.4	2.203	7.64111	5.86008	0.485597	303
7695.	8	0	2.538	7.89175	5.67078	0.699588	310
7696.	8	0	2.481	7.52595	5.6214	0.510288	301
7697.	8	0.4	2.443	7.05177	5.58025	0.403292	328
7698.	8	0	2.538	6.73339	5.65432	0.625514	309
7699.	8	0	2.6	7.78337	6.01646	0.609053	334
7649.	10	0	2.233	6.48953	5.34156	0.0987654	238
7650.	10	0.4	2.59	6.17115	5.18519	0	313
7651.	10	0	2.235	6.55727	5.38272	0	289
7652.	10	0	2.692	6.97726	5.55556	0	330
7653.	10	0.4	2.247	7.10596	5.59671	0	319
7654.	10	0	2.571	7.79014	5.87654	0.1893	337
7655.	10	0.4	2.571	7.61402	5.79424	0	338
7656.	10	0.4	2.41	7.31596	5.65432	0	355
7657.	10	0	2.448	6.91629	5.58848	0	333
7658.	10	0	2.19	7.05854	5.7037	0	347
7659.	10	0	2.399	6.32017	5.6214	0.36214	303
7660.	10	0	2.164	7.32951	5.72016	0.246914	312
7661.	10	0	2.523	7.01113	5.55556	0.139918	310
7662.	10	0	2.241	7.01113	5.2428	0	297
7663.	10	0	2.575	7.61402	5.86008	0.197531	340
7664.	10
7665.	10	0	2.314	6.835	5.36626	0	316
7666.	10
7667.	10
7668.	10	0	2.28	6.44888	5.58848	0.205761	378
7669.	10	0.8	2.769	6.96371	5.25103	0	366
7670.	10	0	2.298	6.69952	5.56379	0	351
7671.	10	0	2.311	6.60468	5.55556	0.238683	343
7672.	10
7673.	10	0.4	2.349	6.32695	5.49794	0	307
7674.	10	0	2.24	6.6521	5.3251	0.296296	354
7675.	10	0	2.39	7.07209	5.45679	0.271605	299
7676.	10	0	1.975	7.03145	5.40741	0	276
7677.	10	0	2.638	6.17792	5.4321	0	305
7678.	10	0	2.714	6.82145	5.53909	0.18107	326
7679.	10	0	2.536	7.44466	5.7284	0.246914	342
7680.	10	0	2.511	6.64533	5.41564	0	333
7681.	10	0	2.543	6.19824	5.23457	0.271605	346
7682.	10	0					364
7683.	10	2	1.854	6.63178	5.9177	0.148148	313
7684.	10	0	2.161	7.16016	5.67078	0	294
7685.	10	0.6	2.451	6.33372	5.19342	0	298
7686.	10	0.4	2.17	6.9908	5.74486	0	295
7687.	10	0	2.549	6.56404	5.65432	0	348
7688.	10	0.4	2.409	6.85532	5.4321	0	316
7689.	10	0.2	2.481	6.50985	5.30864	0	339
7690.	10	0.4	2.492	6.41501	5.3251	0	311
7691.	10	0.8	2.743	6.69952	5.58025	0	300
7692.	10	0.4	2.706	7.19403	5.80247	0	364
7693.	10	0.4	2.568	7.20757	5.30041	0	344
7694.	10	0.4	2.358	6.56404	5.54733	0	327
7695.	10	0	2.478	7.18725	5.54733	0.1893	322
7696.	10	0.2	2.741	6.6521	5.30864	0	353
7697.	10	0.4	2.465	7.09919	5.45679	0	330
7698.	10	0	2.498	6.19824	5.48971	0.238683	330
7699.	10	0.4	2.649	7.24822	5.80247	0.090535	343
7649.	15	0.6	2.101	6.07631	5.21811	0	272
7650.	15	0.4	2.382	5.93405	5.17695	0	300
7651.	15	0	2.01	6.40146	5.33333	0	306
7652.	15	0	2.5	6.63855	5.58848	0	323
7653.	15	1	1.704	6.89597	5.55556	0	286
7654.	15	0	2.338	7.52595	5.65432	0	342
7655.	15	1	2.351	7.64789	5.85185	0	339
7656.	15	0.4	2.355	6.99758	5.54733	0	365
7657.	15	0	2.193	6.88242	5.36626	0	317
7658.	15	0	1.935	6.95016	5.7037	0	341
7659.	15	0					320
7660.	15	0	1.943	6.97048	5.42387	0	328
7661.	15	0	2.324	6.59114	5.41564	0	316
7662.	15	0	2.104	5.8189	5.04527	0	300
7663.	15
7664.	15
7665.	15	0.4	2.268	6.60468	5.28395	0	310
7666.	15
7667.	15
7668.	15	0	2.047	6.55727	5.4321	0	351
7669.	15	1.6	2.456	6.43533	5.06173	0	354
7670.	15	0	2.277	6.90952	5.54733	0	370
7671.	15	0	2.08	6.36759	5.41564	0	317
7672.	15
7673.	15	0.4	2.002	5.91373	5.34979	0	310
7674.	15
7675.	15	0	2.411	6.81468	5.17695	0	325
7676.	15	0.2	2.076	7.06532	5.40741	0	333
7677.	15	0	2.022	6.53017	5.33333	0	292
7678.	15	0.6	2.307	6.84178	5.38272	0	330
7679.	15	0	2.504	6.32017	5.38272	0.106996	356
7680.	15	0.4	2.179	6.40146	5.37449	0	311
7681.	15	0	2.475	6.12373	5.23457	0.17284	348
7682.	15	0.4	2.423	6.66565	5.69547	0	332
7683.	15	2	2.141	5.65632	5.33333	0	319
7684.	15	0	2.4	7.28886	5.57202	0	337
7685.	15	0.4	2.345	6.10341	5.1358	0	331
7686.	15	0.4	2.097	6.74694	5.53909	0	289
7687.	15	0	2.514	6.22534	5.56379	0	369
7688.	15	0.4	2.289	6.65888	5.19342	0	355
7689.	15	0	2.645	6.35404	5.21811	0	380
7690.	15	0.4	2.43	6.10341	5.20988	0	289
7691.	15	0.8	2.338	6.68597	5.58848	0	303
7692.	15
7693.	15	0.4	2.452	6.41501	5.31687	0	369
7694.	15	0.2	2.559	6.43533	5.53909	0	339
7695.	15	0	2.203	7.03145	5.44856	0	303
7696.	15	0.4	2.316	6.77404	5.14403	0	322
7697.	15	0.4	2.594	6.47598	5.31687	0	332
7698.	15	0.2	2.186	6.08308	5.20988	0	303
7699.	15	0.4	2.499	6.76726	5.7037	0	356
7649.	19	0.4	1.933	6.32695	5.2428	0	272
7650.	19	0.2	2.325	5.87986	5.23457	0	288
7651.	19	0	2.176	5.80535	5.25926	0	290
7652.	19	0	2.351	6.6521	5.46502	0	326
7653.	19	1.2	1.852	7.21435	5.61317	0	308
7654.	19	0.2	1.761	7.48531	5.67078	0	276
7655.	19	1	2.295	7.44466	5.8107	0	334
7656.	19	1	2.052	7.32273	5.59671	0	368
7657.	19	0	2.111	6.97048	5.57202	0	315
7658.	19	0	2.151	6.99758	5.69547	0	354
7659.	19	0	2.213	5.77825	5.25926	0	312
7660.	19	0	1.751	6.76726	5.36626	0	308
7661.	19	0	2.376	6.51662	5.40741	0	315
7662.	19	0	2.066	5.75116	5.08642	0	295
7663.	19
7664.	19
7665.	19	0	2.006	6.46243	5.28395	0	305
7666.	19
7667.	19
7668.	19	0	2.195	5.94083	5.3251	0	353
7669.	19
7670.	19	0	2.34	6.36082	5.52263	0	352
7671.	19	0.4	1.761	6.16437	5.33333	0	299
7672.	19
7673.	19	0.6	2.136	5.73083	5.35802	0	293
7674.	19
7675.	19	0.4	2.329	6.74694	5.1358	0	335
7676.	19	0	1.939	7.11274	5.34156	0	328
7677.	19	0.4	1.897	6.32017	5.25926	0	376
7678.	19	0.4	2.269	6.61146	5.26749	0	341
7679.	19	0	2.8	6.35404	5.5144	0	317
7680.	19	0.8	2.47	5.20923	5.1358	0	292
7681.	19	0	2.404	6.42179	5.0535	0	342
7682.	19	0.4	2.194	7.29564	5.63786	0	337
7683.	19	2	1.996	6.24566	5.62963	0	328
7684.	19	0	2.108	7.47853	5.69547	0	332
7685.	19	0.4	2.157	6.22534	5.07819	0	333
7686.	19	1	1.994	6.55049	5.66255	0	268
7687.	19	0	2.471	6.20502	5.58025	0	376
7688.	19	0.4	2.143	6.55727	5.34979	0	360
7689.	19	0	2.529	6.33372	5.21811	0	391
7690.	19	0.4					288
7691.	19	0.8	2.574	6.0018	5.45679	0	300
7692.	19
7693.	19	0.4	2.38	5.98825	5.1358	0	275
7694.	19	0.4	2.026	6.84855	5.53909	0	352
7695.	19	0	1.999	6.94339	5.4321	0	288
7696.	19	0	2.278	6.73339	5.28395	0	333
7697.	19	0.4					324
7698.	19	0.2	2.4	5.96115	5.2428	0	320
7699.	19	1	2.149	7.27531	5.73663	0	347
7649.	23	0.4	2.045	6.5234	5.3251	0	272	1
7650.	23	0	2.049	6.78081	5.3251	0	311	1
7651.	23	0	2.001	6.78758	5.35802	0	290	1
7652.	23	0	2.331	6.8621	5.50617	0	335	0
7653.	23	1.4	2.041	7.26177	5.60494	0	340	1
7654.	23	0	2.145	7.9053	5.74486	0	333	1
7655.	23	0.4	2.239	7.32273	5.67078	0	337	1
7656.	23	1	2.112	7.31596	5.58848	0	320	1
7657.	23	0	2.299	7.19403	5.52263	0	319	1
7658.	23	0	2.009	6.89597	5.72016	0	341	1
7659.	23	0					324	1
7660.	23	0	1.889	7.30918	5.4321	0	340	1
7661.	23	0	2.399	6.9908	5.50617	0	328	1
7662.	23	1	2.182	6.34727	5.12757	0	305	1
7663.	23
7664.	23
7665.	23	0	2.022	7.06532	5.31687	0	310	1
7666.	23
7667.	23
7668.	23	0	2.056	6.63178	5.39095	0	368	1
7669.	23
7670.	23	0	2.331	6.82145	5.53909	0	380
7671.	23	0	2.044	6.69275	5.41564	0	332	0
7672.	23
7673.	23	1	2.065	6.44888	5.45679	0	311	1
7674.	23
7675.	23	0.6	2.338	7.045	5.2428	0	350	1
7676.	23	0	2.233	6.88242	5.44033	0	338
7677.	23	0.2	1.959	6.79436	5.35802		285	1
7678.	23	0.4	2.019	7.045	5.40741	0	310	1
7679.	23	0	2.371	7.16693	5.56379	0	375	1
7680.	23	1	2.577	6.1576	5.30041	0	323	0
7681.	23	0.4	2.416	6.6521	5.02881	0	344	0
7682.	23
7683.	23	0.8	2.138	6.82145	5.68724		331	1
7684.	23	0	2.456	7.33628	5.65432	0	338	1
7685.	23	0.2	2.223	6.3134	5.19342		337	1
7686.	23	2	2.157	6.92306	5.86008	0	299	1
7687.	23	0	2.647	6.22534	5.57202	0	399	1
7688.	23	0	2.303	6.9908	5.39918	0	304	0
7689.	23	0	2.691	6.61823	5.31687	0	405	0
7690.	23	0.4	2.621	6.40146	5.31687	0	315	1
7691.	23	1.4	2.552	6.36759	5.5144	0	315	0
7692.	23
7693.	23	0.4	2.379	6.69952	5.28395	0	371	1
7694.	23	0.4	2.319	6.67242	5.53909	0	337	1
7695.	23
7696.	23	0	2.538	6.95693	5.33333	0	347	1
7697.	23	0.8	2.265	6.53694	5.44033	0	339	1
7698.	23	0.2	2.434	6.34727	5.25926	0	324	1
7699.	23	1.6	2.447	7.045	5.72016	0	379	1
